# Supplementary material
Source: PubMed Central journal article supplement (PMC8811635)
Supplement: EMBR-23-e53543-s004.pdf [file EMBR-23-e53543-s004.pdf]

**Appendix - Single-cell transcriptomics identifies Gadd45b as a regulator of herpesvirus-reactivating neurons**

|                                                                                              |                |
|----------------------------------------------------------------------------------------------|----------------|
| <b>Appendix Table S1 - Upregulated host cellular pathways upon HSV-1 reactivation</b>        | <b>page 2</b>  |
| <b>Appendix Table S2 - List of sequence datasets generated as part of this study</b>         | <b>page 3</b>  |
| <b>Appendix Table S3 - List of HSV-1 ORFs and transcription units included in this study</b> | <b>page 4</b>  |
| <b>Appendix Computer Code 1</b>                                                              | <b>page 5</b>  |
| <b>Appendix Computer Code 2</b>                                                              | <b>page 10</b> |

Aligned data were subsequently imported into Seurat v3.0 for additional quality filtering, identification of highly variable genes, data integration, dimensionality reduction, unsupervised clustering and integrated differential gene expression analysis using MAST. Full details of these analysis are recorded in R Markdown files.

**Appendix Table S1**

| Pathway name                                    | Entities |       |       |          |          | Reactions |       |       | Species name | -log <sub>10</sub> (FDR) |
|-------------------------------------------------|----------|-------|-------|----------|----------|-----------|-------|-------|--------------|--------------------------|
|                                                 | found    | Total | ratio | pValue   | FDR      | found     | total | ratio |              |                          |
| Cellular responses to stress                    | 9        | 691   | 0.047 | 7.67E-04 | 9.97E-03 | 20        | 227   | 0.018 | Homo sapiens | 2.00                     |
| HSF1 activation                                 | 6        | 43    | 0.003 | 1.29E-08 | 2.07E-07 | 1         | 7     | 0.001 | Homo sapiens | 6.68                     |
| Cellular response to heat stress                | 9        | 135   | 0.009 | 1.45E-09 | 2.91E-08 | 12        | 29    | 0.002 | Homo sapiens | 7.54                     |
| Regulation of HSF1-mediated heat shock response | 9        | 113   | 0.008 | 3.11E-10 | 8.40E-09 | 7         | 14    | 0.001 | Homo sapiens | 8.08                     |
| HSF1-dependent transactivation                  | 8        | 59    | 0.004 | 5.16E-11 | 2.11E-09 | 4         | 8     | 0.001 | Homo sapiens | 8.68                     |
| Attenuation phase                               | 8        | 47    | 0.003 | 8.64E-12 | 7.17E-10 | 3         | 5     | 0     | Homo sapiens | 9.14                     |

Pathway analysis of differentially expressed genes reported in Dataset EV1 identified six cellular pathways impacted by HSV-1 reactivation

**Appendix Table S2**

| Sample ID                                  | Simple name      | Experiment accession | Run accession | Chemistry                               | Batch | Estimated number of cells [ post filtering ] |
|--------------------------------------------|------------------|----------------------|---------------|-----------------------------------------|-------|----------------------------------------------|
| Uninfected BioRep #1                       | Uninf_V2_rep_1   | ERX4858799           | ERR5052726    | 10X Genomics Chromium Single Cell 3' v2 | 1     | 3066                                         |
| Latent BioRep #1                           | Lat_V2_rep_1     | ERX4858240           | ERR5051908    |                                         |       | 1058                                         |
| Latent BioRep #2                           | Lat_V2_rep_2     | ERX4858255           | ERR5051923    |                                         | 2     | 3871                                         |
| Reactivation (20 hrs) BioRep #1            | Reac20_V2_rep_1  | ERX4858418           | ERR5052302    |                                         |       | 5675                                         |
| Reactivation (48 hrs) BioRep #1            | Reac48_V2_rep_1  | ERX4858600           | ERR5052485    |                                         |       | 2727                                         |
| Latent BioRep #3                           | Lat_V2_rep_3     | ERX4858416           | ERR5052300    |                                         |       | 2079                                         |
| Uninfected BioRep #2                       | Uninf_V2_rep_2   | ERX4858776           | ERR5052682    |                                         | 4     | 2832                                         |
| Uninfected (20 hrs LY treatment) BioRep #1 | UninfLY_V2_rep_3 | ERX4858740           | ERR5052625    |                                         |       | 1661                                         |
| Reactivation (20 hrs) BioRep #2            | Reac20_V3_rep_1  | ERX4858599           | ERR5052484    |                                         |       | 5                                            |
| Reactivation (48 hrs) BioRep #2            | Reac48_V3_rep_1  | ERX4858735           | ERR5052620    |                                         | 1700  |                                              |
| Reactivation (72 hrs) BioRep #1            | Reac72_V3_rep_1  | ERX4858741           | ERR5052626    | 2163                                    |       |                                              |

List of sequence datasets generated as part of this study. Libraries were sequenced in paired-end mode on either an Illumina HiSeq 4000 or Illumina NovaSeq 6000.

All data are available via the European Nucleotide Archive under project accession: PRJEB39022

### Appendix Table S3

| Transcription Unit | HSV-1 transcripts      |
|--------------------|------------------------|
| LAT                | LAT*                   |
| RL1                | RL1*                   |
| RL2                | RL2*                   |
| RS1                | RS1*                   |
| TU1                | UL1; UL2; UL3          |
| TU10               | US8; US8A; US9         |
| TU11               | UL4; UL5               |
| TU12               | UL8; UL9               |
| TU13               | UL11; UL12; UL13; UL14 |
| TU14               | UL16; UL17             |
| TU15               | UL18; UL19; UL20       |
| TU16               | UL27; UL28             |
| TU17               | UL31; UL32             |
| TU18               | UL46; UL47             |
| TU19               | UL49; UL49A            |
| TU2                | UL6; UL7               |
| TU20               | US10; US11gfp; US12    |
| TU3                | UL24; UL25; UL26       |
| TU4                | UL33; UL34; UL35       |
| TU5                | UL38; UL39; UL40       |
| TU6                | UL43; UL44; UL45       |
| TU7                | UL52; UL53; UL54; UL55 |
| TU8                | US3; US4               |
| TU9                | US5; US6; US7          |
| UL10               | UL10                   |
| UL15               | UL15                   |
| UL21               | UL21                   |
| UL22               | UL22                   |
| UL23               | UL23                   |
| UL29               | UL29                   |
| UL30               | UL30                   |
| UL36               | UL36                   |
| UL37               | UL37                   |
| UL41               | UL41                   |
| UL42               | UL42                   |
| UL50               | UL50                   |
| UL51               | UL51                   |
| UL56               | UL56                   |
| US1                | US1                    |
| US12               | US12                   |
| US2                | US2                    |

\* data aggregated between both copies

HSV-1 RNAs were grouped into a set of 20 transcription units (TU1-20) for the purposes of mapping and analysis.

List of HSV-1 ORFs and transcription units (TUs) included in this study. Transcription units comprise multiple ORFs encoded on overlapping mRNAs.

## scRNASeq-V2-analysis

### ### Load required libraries

```
library(Seurat)
library(cowplot)
library(dplyr)
library(Matrix)
library(MAST)
```

### ### Import Cell Ranger Gene Expression Matrices

```
dms01.data <- Read10X(data.dir = "/path/to/scRNASeq-V2data/Uninf_V2_rep_1/")
dms02.data <- Read10X(data.dir = "/path/to/scRNASeq-V2data/Uninf_V2_rep_2/")
ly.data <- Read10X(data.dir = "/path/to/scRNASeq-V2data/UninfLY_V2_rep_3/")
latent1.data <- Read10X(data.dir = "/path/to/scRNASeq-V2data/Lat_V2_rep_1/")
latent2.data <- Read10X(data.dir = "/path/to/scRNASeq-V2data/Lat_V2_rep_2/")
latent3.data <- Read10X(data.dir = "/path/to/scRNASeq-V2data/Lat_V2_rep_3/")
ly20.data <- Read10X(data.dir = "/path/to/scRNASeq-V2data/Reac20_V2_rep_1/")
ly48.data <- Read10X(data.dir = "/path/to/scRNASeq-V2data/Reac20_V2_rep_2/")
```

### ### Setup Seurat Objects

```
dms01 <- CreateSeuratObject(counts = dms01.data)
dms02 <- CreateSeuratObject(counts = dms02.data)
ly <- CreateSeuratObject(counts = ly.data)
latent1 <- CreateSeuratObject(counts = latent1.data)
latent2 <- CreateSeuratObject(counts = latent2.data)
latent3 <- CreateSeuratObject(counts = latent3.data)
ly20 <- CreateSeuratObject(counts = ly20.data)
ly48 <- CreateSeuratObject(counts = ly48.data)
```

### ### Data exploration to determine filtering parameters

```
ly20[["percent.mt"]] <- PercentageFeatureSet(object = ly20, pattern = "^Mt-")
v2<-VlnPlot(object = ly20, features = c("nFeature_RNA", "nCount_RNA", "percent.mt"),
ncol = 3)
plot1 <- FeatureScatter(object = ly20, feature1 = "nCount_RNA", feature2 =
"percent.mt")
plot2 <- FeatureScatter(object = ly20, feature1 = "nCount_RNA", feature2 =
"nFeature_RNA")
plot_grid(plot1,plot2,v2)
```

```
ly48[["percent.mt"]] <- PercentageFeatureSet(object = ly48, pattern = "^Mt-")
v3<-VlnPlot(object = ly48, features = c("nFeature_RNA", "nCount_RNA", "percent.mt"),
ncol = 3)
plot1 <- FeatureScatter(object = ly48, feature1 = "nCount_RNA", feature2 =
"percent.mt")
plot2 <- FeatureScatter(object = ly48, feature1 = "nCount_RNA", feature2 =
"nFeature_RNA")
plot_grid(plot1,plot2,v3)
```

```
ly[["percent.mt"]] <- PercentageFeatureSet(object = ly, pattern = "^Mt-")
v4<-VlnPlot(object = ly, features = c("nFeature_RNA", "nCount_RNA", "percent.mt"),
ncol = 3)
plot1 <- FeatureScatter(object = ly, feature1 = "nCount_RNA", feature2 =
"percent.mt")
```

```

plot2 <- FeatureScatter(object = ly, feature1 = "nCount_RNA", feature2 =
"nFeature_RNA")
plot_grid(plot1,plot2,v4)

dmsol[["percent.mt"]] <- PercentageFeatureSet(object = dmsol, pattern = "^Mt-")
v5<-VlnPlot(object = dmsol, features = c("nFeature_RNA", "nCount_RNA", "percent.mt"),
ncol = 3)
plot1 <- FeatureScatter(object = dmsol, feature1 = "nCount_RNA", feature2 =
"percent.mt")
plot2 <- FeatureScatter(object = dmsol, feature1 = "nCount_RNA", feature2 =
"nFeature_RNA")
plot_grid(plot1,plot2,v5)

dmsol2[["percent.mt"]] <- PercentageFeatureSet(object = dmsol2, pattern = "^Mt-")
v6<-VlnPlot(object = dmsol2, features = c("nFeature_RNA", "nCount_RNA", "percent.mt"),
ncol = 3)
plot1 <- FeatureScatter(object = dmsol2, feature1 = "nCount_RNA", feature2 =
"percent.mt")
plot2 <- FeatureScatter(object = dmsol2, feature1 = "nCount_RNA", feature2 =
"nFeature_RNA")
plot_grid(plot1,plot2,v6)

latent1[["percent.mt"]] <- PercentageFeatureSet(object = latent1, pattern = "^Mt-")
v7<-VlnPlot(object = latent1, features = c("nFeature_RNA", "nCount_RNA",
"percent.mt"), ncol = 3)
plot1 <- FeatureScatter(object = latent1, feature1 = "nCount_RNA", feature2 =
"percent.mt")
plot2 <- FeatureScatter(object = latent1, feature1 = "nCount_RNA", feature2 =
"nFeature_RNA")
plot_grid(plot1,plot2,v7)

latent2[["percent.mt"]] <- PercentageFeatureSet(object = latent2, pattern = "^Mt-")
v12<-VlnPlot(object = latent2, features = c("nFeature_RNA", "nCount_RNA",
"percent.mt"), ncol = 3)
plot1 <- FeatureScatter(object = latent2, feature1 = "nCount_RNA", feature2 =
"percent.mt")
plot2 <- FeatureScatter(object = latent2, feature1 = "nCount_RNA", feature2 =
"nFeature_RNA")
plot_grid(plot1,plot2,v12)

latent3[["percent.mt"]] <- PercentageFeatureSet(object = latent3, pattern = "^Mt-")
v9<-VlnPlot(object = latent3, features = c("nFeature_RNA", "nCount_RNA",
"percent.mt"), ncol = 3)
plot1 <- FeatureScatter(object = latent3, feature1 = "nCount_RNA", feature2 =
"percent.mt")
plot2 <- FeatureScatter(object = latent3, feature1 = "nCount_RNA", feature2 =
"nFeature_RNA")
plot_grid(plot1,plot2,v9)
` ``

### Filter datasets
ly20$stim <- "ly20"
ly20 <- subset(x = ly20, subset = nFeature_RNA > 500 & nCount_RNA < 60000 &
percent.mt < 25)
ly20 <- NormalizeData(object = ly20, verbose = FALSE)

```

```

ly20 <- FindVariableFeatures(object = ly20, selection.method = "vst", nfeatures =
2000)

ly48$stim <- "ly48"
ly48 <- subset(x = ly48, subset = nFeature_RNA > 500 & nCount_RNA < 60000 &
percent.mt < 25)
ly48 <- NormalizeData(object = ly48, verbose = FALSE)
ly48 <- FindVariableFeatures(object = ly48, selection.method = "vst", nfeatures =
2000)

ly$stim <- "ly"
ly <- subset(x = ly, subset = nFeature_RNA > 500 & nCount_RNA < 60000 & percent.mt <
25)
ly <- NormalizeData(object = ly, verbose = FALSE)
ly <- FindVariableFeatures(object = ly, selection.method = "vst", nfeatures = 2000)

dms01$stim <- "dms01"
dms01 <- subset(x = dms01, subset = nFeature_RNA > 500 & nCount_RNA < 60000 &
percent.mt < 25)
dms01 <- NormalizeData(object = dms01, verbose = FALSE)
dms01 <- FindVariableFeatures(object = dms01, selection.method = "vst", nfeatures =
2000)

dms02$stim <- "dms02"
dms02 <- subset(x = dms02, subset = nFeature_RNA > 500 & nCount_RNA < 60000 &
percent.mt < 25)
dms02 <- NormalizeData(object = dms02, verbose = FALSE)
dms02 <- FindVariableFeatures(object = dms02, selection.method = "vst", nfeatures =
2000)

latent1$stim <- "latent1"
latent1 <- subset(x = latent1, subset = nFeature_RNA > 500 & nCount_RNA < 60000 &
percent.mt < 25)
latent1 <- NormalizeData(object = latent1, verbose = FALSE)
latent1 <- FindVariableFeatures(object = latent1, selection.method = "vst", nfeatures
= 2000)

latent2$stim <- "latent2"
latent2 <- subset(x = latent2, subset = nFeature_RNA > 500 & nCount_RNA < 60000 &
percent.mt < 25)
latent2 <- NormalizeData(object = latent2, verbose = FALSE)
latent2 <- FindVariableFeatures(object = latent2, selection.method = "vst", nfeatures
= 2000)

latent3$stim <- "latent3"
latent3 <- subset(x = latent3, subset = nFeature_RNA > 500 & nCount_RNA < 60000 &
percent.mt < 25)
latent3 <- NormalizeData(object = latent3, verbose = FALSE)
latent3 <- FindVariableFeatures(object = latent3, selection.method = "vst", nfeatures
= 2000)

### Find Integration Anchors
reactivation.anchors <- FindIntegrationAnchors(object.list = list(ly20, ly48, ly,
dms01, dms02, latent1, latent2, latent3), dims = 1:25)
reactivation.combined <- IntegrateData(anchorset = reactivation.anchors, dims = 1:25)

```

```

### Report number of cells present in each dataset post-filtering
table(reactivation.combined@meta.data$stim)

### Generate UMAP plot for combined dataset
DefaultAssay(object = reactivation.combined) <- "integrated"

# Run the standard workflow for visualization and clustering
reactivation.combined <- ScaleData(object = reactivation.combined, verbose = FALSE)
reactivation.combined <- RunPCA(object = reactivation.combined, npcs = 30, verbose = FALSE)

# t-SNE and Clustering
reactivation.combined <- RunUMAP(object = reactivation.combined, reduction = "pca",
dims = 1:15)
reactivation.combined <- FindNeighbors(object = reactivation.combined, reduction =
"pca", dims = 1:15)
reactivation.combined <- FindClusters(reactivation.combined, resolution = 0.2)

# Visualization
p1 <- DimPlot(object = reactivation.combined, reduction = "umap", group.by = "stim")
p2 <- DimPlot(object = reactivation.combined, reduction = "umap", label = TRUE)
plot_grid(p1, p2)

### Generate individual UMAP plots for each dataset
DimPlot(reactivation.combined, reduction = "umap", split.by = "stim", ncol = 3)
table(Idsents(reactivation.combined), reactivation.combined$stim)

### Generate plots showing expression levels of select genes across cell population
FeaturePlot(object = reactivation.combined, features = c("Prph", "Tubb3", "Sox10",
"S100b", "Aif1", "Cd68", "Col1a1", "Fn1", "Sox2", "percent.mt", "Gadd45b", "Th"),
min.cutoff = "q9", cols = c("grey", "red"))

### Assign cell type identities (based on expression patterns observed in above plots)
reactivation.combined <- RenameIdsents(object = reactivation.combined, `0` =
"neurons", `1` = "neurons", `2` = "fibroblasts", `3` = "neurons", `4` = "Satellite
glial cells", `5` = "Schwann cells", `6` = "neurons", `7` = "neurons", `8` =
"neurons", `9` = "fibroblasts", `10` = "neurons", `11` = "neurons")

DimPlot(object = reactivation.combined, label = FALSE, cols = c("blue", "tomato3",
"limegreen", "goldenrod1"), split.by="stim")

table(Idsents(reactivation.combined), reactivation.combined$stim)

### Subset data to focus on neurons only
neurons2.combined <- subset(reactivation.combined, idsents = "neurons")
Idsents(neurons2.combined) <- "stim"

# t-SNE and Clustering
neurons2.combined <- RunTSNE(object = neurons.combined, reduction = "pca", dims =
1:15)
neurons2.combined <- FindNeighbors(object = neurons.combined, reduction = "pca", dims
= 1:15)
neurons2.combined <- FindClusters(neurons.combined, resolution = 0.2)

```



```
# Visualization
p1 <- DimPlot(object = neurons2.combined, reduction = "umap", group.by = "stim")
p2 <- DimPlot(object = neurons2.combined, reduction = " umap ", label = TRUE)
plot_grid(p1, p2)

### Generate plots showing expression levels of select genes across neuronal population
FeaturePlot(object = neurons.combined, features = c("Npy", 'Dbh', 'Th',
"percent.mt"), min.cutoff = "q9", cols = c("grey", "blue"), ncol = 3)
```

## scRNASeq-V3-analysis

```
### Load libraries
library(rlang)
library(Seurat)
library(cowplot)
library(dplyr)
library(Matrix)
library(MAST)
library(EnhancedVolcano)

### Load CellRanger Gene Expression Matrices
ly20.data <- Read10X(data.dir = "/path/to/scRNASeq-V2data/Reac20_V3_rep_1/")
ly48.data <- Read10X(data.dir = "/path/to/scRNASeq-V2data/Reac48_V3_rep_1/")
ly72.data <- Read10X(data.dir = "/path/to/scRNASeq-V2data/Reac72_V3_rep_1/")

### Setup Seurat objects and perform simple data exploration of (i) number of
features, (ii) feature counts, (iii), fraction of mitochondrial reads per cell
ly20 <- CreateSeuratObject(counts = ly20.data)
ly48 <- CreateSeuratObject(counts = ly48.data)
ly72 <- CreateSeuratObject(counts = ly72.data)

ly20[["percent.mt"]] <- PercentageFeatureSet(object = ly20, pattern = "^Mt-")
v1<-VlnPlot(object = ly20, features = c("nFeature_RNA", "nCount_RNA", "percent.mt"),
ncol = 3)
plot1 <- FeatureScatter(object = ly20, feature1 = "nCount_RNA", feature2 =
"percent.mt")
plot2 <- FeatureScatter(object = ly20, feature1 = "nCount_RNA", feature2 =
"nFeature_RNA")
plot_grid(plot1,plot2,v1)

ly48[["percent.mt"]] <- PercentageFeatureSet(object = ly48, pattern = "^Mt-")
v2<-VlnPlot(object = ly48, features = c("nFeature_RNA", "nCount_RNA", "percent.mt"),
ncol = 3)
plot1 <- FeatureScatter(object = ly48, feature1 = "nCount_RNA", feature2 =
"percent.mt")
plot2 <- FeatureScatter(object = ly48, feature1 = "nCount_RNA", feature2 =
"nFeature_RNA")
plot_grid(plot1,plot2,v2)

ly72[["percent.mt"]] <- PercentageFeatureSet(object = ly72, pattern = "^Mt-")
v3<-VlnPlot(object = ly72, features = c("nFeature_RNA", "nCount_RNA", "percent.mt"),
ncol = 3)
plot1 <- FeatureScatter(object = ly72, feature1 = "nCount_RNA", feature2 =
"percent.mt")
plot2 <- FeatureScatter(object = ly72, feature1 = "nCount_RNA", feature2 =
"nFeature_RNA")
plot_grid(plot1,plot2,v3)

### Filter datasets to exclude possible doublets and cells with a higher fraction of
mitochondrial reads (>25%)
ly20$stim <- "ly20"
```

```

ly20 <- subset(x = ly20, subset = nFeature_RNA > 500 & nCount_RNA < 150000 &
percent.mt < 25)
ly20 <- NormalizeData(object = ly20, verbose = FALSE)
ly20 <- FindVariableFeatures(object = ly20, selection.method = "vst", nfeatures =
2000)

ly48$stim <- "ly48"
ly48 <- subset(x = ly48, subset = nFeature_RNA > 500 & nCount_RNA < 150000 &
percent.mt < 25)
ly48 <- NormalizeData(object = ly48, verbose = FALSE)
ly48 <- FindVariableFeatures(object = ly48, selection.method = "vst", nfeatures =
2000)

ly72$stim <- "ly72"
ly72 <- subset(x = ly72, subset = nFeature_RNA > 500 & nCount_RNA < 150000 &
percent.mt < 25)
ly72 <- NormalizeData(object = ly72, verbose = FALSE)
ly72 <- FindVariableFeatures(object = ly72, selection.method = "vst", nfeatures =
2000)

### Integrate datasets using first 20 dimensions + report number of cells in each
dataset post-filtering
reactivation.anchors <- FindIntegrationAnchors(object.list = list(ly20, ly48, ly72),
dims = 1:20) #latent
reactivation.combined <- IntegrateData(anchorset = reactivation.anchors, dims = 1:20)
table(reactivation.combined@meta.data$stim)

### Scale and cluster data + Generate UMAP plots.
DefaultAssay(object = reactivation.combined) <- "integrated"
reactivation.combined <- ScaleData(object = reactivation.combined, verbose = FALSE)
reactivation.combined <- RunPCA(object = reactivation.combined, npcs = 30, verbose =
FALSE)
reactivation.combined <- RunUMAP(object = reactivation.combined, reduction = "pca",
dims = 1:25)
reactivation.combined <- FindNeighbors(object = reactivation.combined, reduction =
"pca", dims = 1:25)
reactivation.combined <- FindClusters(reactivation.combined, resolution = 0.2)
p1 <- DimPlot(object = reactivation.combined, reduction = "umap", group.by = "stim")
p2 <- DimPlot(object = reactivation.combined, reduction = "umap", label = TRUE)
plot_grid(p1, p2)

### Separate UMAP plots by dataset & determine number of cells per identity
DimPlot(reactivation.combined, reduction = "umap", split.by = "stim", ncol = 3)
table(Idsents(reactivation.combined), reactivation.combined$stim)

### Generate plots for canonical markers to aid in cell type identification
# Sympathetic neurons: Prph, Tubb3, Snap25
# Schwann cells: Sox10, S100b
# Satellite glial cells: Aif1, Cd68
# Fibroblasts: Fn1, Col3a1, Col1a1
FeaturePlot(object = reactivation.combined, features = c("Prph", "Tubb3", "Snap25",
"Sox10", "S100b", "nes", "Aif1", "Cd68", "Col3a1", "Fn1", "Col1a1", "percent.mt"),
min.cutoff = "q9") #"nCount_RNA", "nFeature_RNA" percent.mt

```

```

### Generate plots for viral RNA markers to identify cells/clusters with reactivating
virus
FeaturePlot(object = reactivation.combined, features = c("TU1", "TU2", "TU3", "TU4",
" TU5", "TU6", "TU7", "TU8", "TU9", "TU10", "TU11", "TU12", "TU13", "TU14", "TU15",
" TU16", "TU17", "TU18", "TU19", "TU20"), min.cutoff = "q9")

### Merge similar clusters and label with cell identity + generate counts of each
cell type per condition
reactivation.combined <- RenameIdents(object = reactivation.combined, `0` =
"neurons", `1` = "Schwann cell", `2` = "Fibroblasts", `3` = "Schwann cell", `4` =
"neurons", `5` = "Schwann cell", `6` = "Schwann cell", `7` = "Schwann cell", `8` =
"neurons")
DimPlot(object = reactivation.combined, label = FALSE)
table(Idents(reactivation.combined), reactivation.combined$stim)

### Subset data to focus on neurons only
neurons.combined <- subset(reactivation.combined, idents = "neurons")
Idents(neurons.combined) <- "stim"

# t-SNE and Clustering
neurons.combined <- RunTSNE(object = neurons.combined, reduction = "pca", dims =
1:20)
neurons.combined <- FindNeighbors(object = neurons.combined, reduction = "pca", dims
= 1:20)
neurons.combined <- FindClusters(neurons.combined, resolution = 0.2)

# Visualization
p1 <- DimPlot(object = neurons.combined, reduction = "umap", group.by = "stim") #umap
rather than tsne?
p2 <- DimPlot(object = neurons.combined, reduction = "umap", label = TRUE)
plot_grid(p1, p2)

### Check whether HSV-1 RNAs are enriched in one or more neuronal subsets
FeaturePlot(object = neurons.combined, features = c("TU1", "TU2", "TU3", "TU4",
" TU5", "TU6", "TU7", "TU8", "TU9", "TU10", "TU11", "TU12", "TU13", "TU14", "TU15",
" TU16", "TU17", "TU18", "TU19", "TU20"), min.cutoff = "q9")

### Label neurons according to expression level of HSV-1 transcripts
neurons.combined <- RenameIdents(object = neurons.combined, `0` = "neurons (low/no
HSV-1 expression)", `1` = "neurons (low/no HSV-1 expression)", `2` = "neurons (low/no
HSV-1 expression)", `3` = "neurons (low/no HSV-1 expression)", `4` = "neurons (low/no
HSV-1 expression)", `5` = "neurons (high HSV-1 expression)")
DimPlot(object = neurons.combined, label = FALSE)

### Perform DGE between clusters using MAST
dds <- FindMarkers(neurons.combined, ident.1 = "neurons (high HSV-1 expression)",
ident.2 = "neurons (low/no HSV-1 expression)", test.use="MAST")

### Generate Volcano Plot, and export data.
EnhancedVolcano(dds, lab = rownames(dds), x = 'avg_logFC', y = 'p_val_adj',
ylim=c(0,350), xlim = c(-3, 8), title = 'Regulated during HSV-1 reactivation',
pCutoff = 0.05, FCcutoff = 1.5, transcriptLabSize = 4.0,
col=c('darkgrey','darkgrey','darkgrey','darkred'), transcriptPointSize = 1.5,
cutoffLineCol = 'blue', colAlpha = 0.9)

```

```

EnhancedVolcano(dds, lab = rownames(dds), x = 'avg_logFC', y = 'p_val_adj',
ylim=c(0,350), xlim = c(-3, 8), pCutoff = 0.05, FCcutoff = 1.5, transcriptLabSize =
4.0, col=c('darkgrey','darkgrey','darkgrey','darkred'), transcriptPointSize = 1.5,
cutoffLineCol = 'blue', colAlpha = 0.9, drawConnectors = TRUE, widthConnectors = 0.2,
colConnectors = "grey")
EnhancedVolcano(dds, lab = rownames(dds), x = 'avg_logFC', y = 'p_val_adj',
ylim=c(0,350), xlim = c(-3, 8), pCutoff = 0.05, FCcutoff = 1.5,
col=c('darkgrey','darkgrey','darkgrey','darkred'), transcriptPointSize = 1.5,
cutoffLineCol = 'blue', colAlpha = 0.9, selectLab = "TU3")
write.table(dds,file="MAST-DGE.csv")

```

```

### Generate heatmap comparing clusters

```

```

# Set up list of viral transcription units to plot

```

```

VirusList <- c("TU1", "TU2", "TU3", "TU4", "TU5", "TU6", "TU7", "TU8", "TU9", "TU10",
" TU11", "TU12", "TU14", "TU15", "TU16", "TU17", "TU18", "TU19", "TU20", "US1",
"US12", "RS1", "RL1", "RL2")

```

```

# Set up list of significantly upregulated cellular genes to plot

```

```

HostUpList <-

```

```

c("AABR07030834.1","Cdkn1c","Gadd45b","Gadd45g","Galns","Hspa1b","Hspa2","Idi1","Igf2",
"Ing1","Ldah","LOC690422","Mgp","Nefh","Nefm","Nusap1","RGD1562673","Srsf2","Tchh",
"Zdbf2")

```

```

# Set up list of randomly sampled cellular genes that are not differentially
expressed

```

```

HostNoChangelist <-

```

```

c("Bag3","Chp1","Ddit3","Fdft1","Gadd45a","Ngb","Rgs17","S100a1","Serpinb1a","Vip")

```

```

# Set up list of significantly downregulated cellular genes to plot

```

```

HostDownList <- c("Basp1", "Hspb1", "Mmd")

```

```

# Randomly subsample 100 cells from each population (to make plot manageable)

```

```

sample<-subset(neurons.combined, downsample=100)

```

```

### Generated plots

```

```

DoHeatmap(sample, features = VirusList, size = 3) + scale_fill_gradientn(colors =
rev(RColorBrewer::brewer.pal(n = 7, name = "RdBu")))

```

```

DoHeatmap(sample, features = HostUpList, size = 3) + scale_fill_gradientn(colors =
rev(RColorBrewer::brewer.pal(n = 7, name = "RdBu")))

```

```

DoHeatmap(sample, features = HostDownList, size = 3) + scale_fill_gradientn(colors =
rev(RColorBrewer::brewer.pal(n = 7, name = "RdBu")))

```

```

DoHeatmap(sample, features = HostNoChangelist, size = 3) +

```

```

scale_fill_gradientn(colors = rev(RColorBrewer::brewer.pal(n = 7, name = "RdBu")))

```
