# Supplementary material
Source: PubMed Central journal article supplement (PMC8811635)

Figure 6C

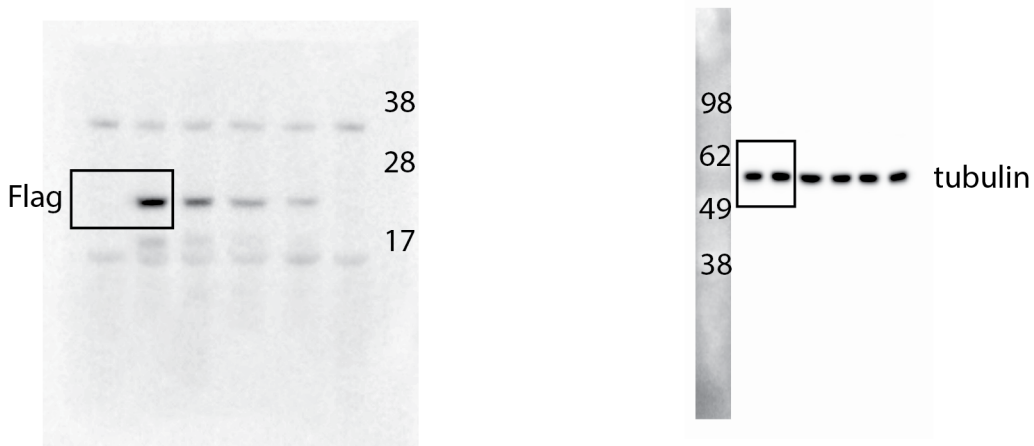

Figure 6G

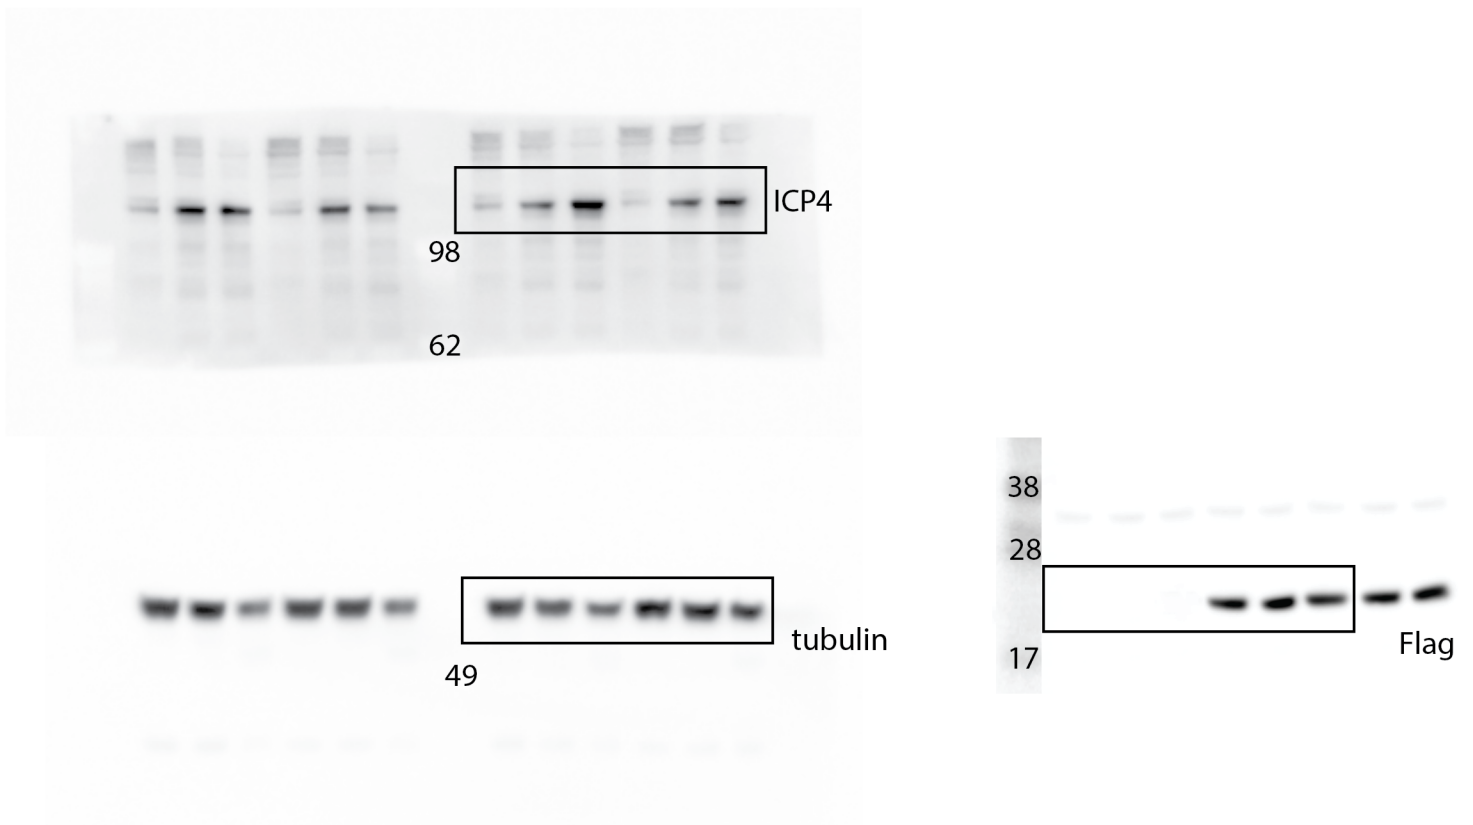

Supplement: EMBR-23-e53543-s001.pdf [file EMBR-23-e53543-s001.pdf]
